# Supplementary material for: HPLC Analysis and Risk Assessment of 15 Priority PAHs in Human Blood Serum of COPD Patient from Urban and Rural Areas, Iasi (Romania)
Source: MDPI journal article supplement (doi:10.3390/jpm13091290), 2023-08-23
Supplement: s1 [file s1]

## Supplementary Materials

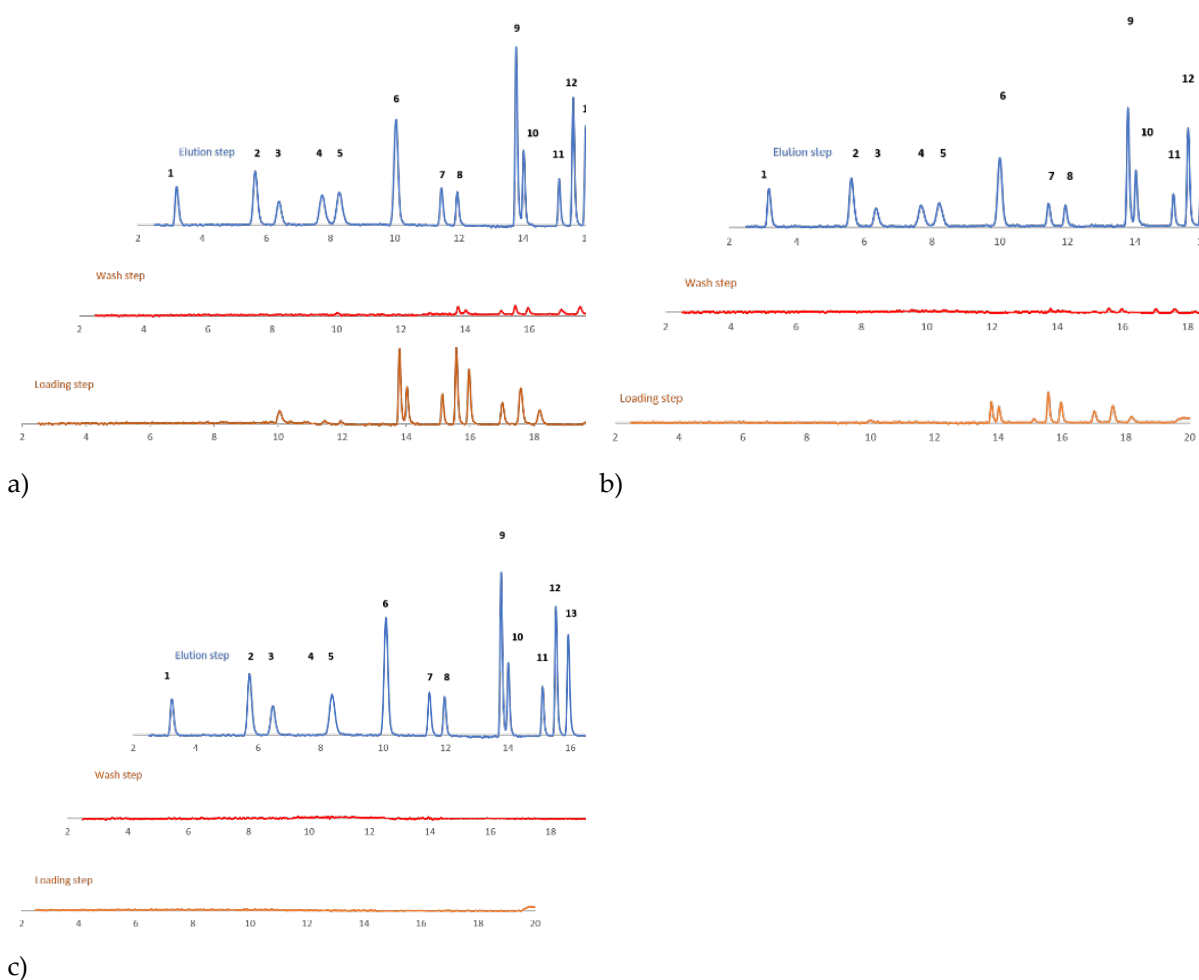

**Figure S1.** Method development, SPE conditions. a) DCM:ETA (50:50%) (2ml), MeOH (2 ml), H<sub>2</sub>O (2 ml)), load plasma +100ng/mL PAHs+100ng/mL P.D10 (1 ml), wash 2 ml H<sub>2</sub>O, elution DCM:ETA (50:50%) (2 ml); b) DCM (2ml), MeOH (2 ml), H<sub>2</sub>O (2 ml)), load plasma +100ng/mL PAHs+100ng/mL P.D10 (1 ml)+9 ml MeOH:H<sub>2</sub>O (10:90%) ,wash 2 ml H<sub>2</sub>O, elution DCM:ETA (50:50%) (2 ml); c) DCM (6ml), MeOH (6 ml), H<sub>2</sub>O (6 ml)), load plasma +100ng/mL PAHs+100ng/mL P.D10 (1 ml)+19 ml MeOH:H<sub>2</sub>O (10:90%) ,wash 12 ml H<sub>2</sub>O, elution DCM:ETA (50:50%) (5 ml). Elution order: 1-N, 2-Ace, 3-Fl, 4-P, 5-P.D10, 6-A, 7-Flu, 8-Py, 9-BaA, 10-Ch, 11-B(b)Flu, 12-B(k)Flu, 13-BaPy, 14-D(ah)A 15-BghiPY, 16-IPy.

**Table S1.** Linearity parameters

| PAHs | Calibration curves | R <sup>2</sup> | Sy   | F value | Slope p-value | Tstat |
|------|--------------------|----------------|------|---------|---------------|-------|
| N    | 202.33x+1.535      | 0.9997         | 1.14 | 555112  | 1.97277E-07   | 74.24 |
| Ace  | 92.032x+0.116      | 0.9991         | 1.26 | 4527.3  | 2.92309E-07   | 67.28 |
| Fl   | 190.62x-0.318      | 0.9997         | 0.77 | 12115   | 4.08576E-08   | 110.1 |
| P    | 105.75x+1.943      | 0.9990         | 1.31 | 4155.8  | 3.46846E-07   | 64.47 |

|                |               |        |      |        |             |       |
|----------------|---------------|--------|------|--------|-------------|-------|
| <b>A</b>       | 33.875x+0.737 | 0.9993 | 1.14 | 5460.0 | 2.0102E-07  | 73.89 |
| <b>Flu</b>     | 172.77x+1.238 | 0.9983 | 1.75 | 2336.4 | 1.09599E-06 | 48.34 |
| <b>Py</b>      | 194.02x+0.856 | 0.9972 | 2.25 | 1410.3 | 3.00261E-06 | 37.55 |
| <b>BaA</b>     | 59.139x+0.310 | 0.9997 | 0.79 | 11609  | 4.44939E-08 | 107.7 |
| <b>Ch</b>      | 156.14x+0.178 | 0.9993 | 1.12 | 5741.8 | 1.8178E-07  | 75.77 |
| <b>B(b)Flu</b> | 183.86x+1.432 | 0.9989 | 1.41 | 3628.4 | 4.54901E-07 | 60.24 |
| <b>B(k)Flu</b> | 76.292x+0.523 | 0.9998 | 0.58 | 21271  | 1.32572E-08 | 145.8 |
| <b>BaPy</b>    | 81.132x+0.575 | 0.9996 | 0.86 | 9616.4 | 6.48378E-08 | 98.06 |
| <b>D(ah)A</b>  | 285.86x+0.527 | 0.9971 | 2.27 | 1393.5 | 3.07517E-06 | 37.33 |
| <b>BghiPY</b>  | 154.18x+0.871 | 0.9994 | 1.04 | 6686.4 | 1.34071E-07 | 81.77 |
| <b>IPy</b>     | 290.79x+1.062 | 0.9992 | 1.23 | 4762.5 | 2.64166E-07 | 69.01 |

**Table S2.** Stability of retention time and estimated concentrations using regression slopes.

| <b>PAHs</b> | <b>Rt average</b> | <b>RSD%</b> | <b>Estimated concentration</b> | <b>RSD%</b> |
|-------------|-------------------|-------------|--------------------------------|-------------|
| N           | 3.2               | 1.23        | 100.1                          | 0.56        |
| Ace         | 5.65              | 1.04        | 100.2                          | 0.45        |
| FL          | 6.385             | 1.20        | 100.0                          | 0.26        |
| P           | 8.26              | 0.49        | 98.9                           | 1.10        |
| A           | 10.055            | 1.13        | 99.1                           | 1.25        |
| Flu         | 11.485            | 0.19        | 100.7                          | 0.85        |
| Py          | 11.98             | 0.09        | 100.5                          | 0.56        |
| BA          | 13.805            | 0.08        | 99.3                           | 0.92        |
| Ch          | 14.045            | 0.07        | 99.1                           | 1.02        |
| BbFlu       | 15.145            | 0.13        | 100.1                          | 0.26        |
| BkFlu       | 15.58             | 0.17        | 98.9                           | 0.86        |
| BaPy        | 15.98             | 0.18        | 99.1                           | 0.72        |
| DahA        | 17.025            | 0.24        | 99.6                           | 1.25        |
| BghiP       | 17.605            | 0.27        | 100.1                          | 0.93        |
| IPy         | 18.195            | 0.38        | 100.5                          | 0.25        |
